# Supplementary material for: Snowflake-shaped poly(3-thiophenemalonic acid) combined with carbonized ZIF-8@ZIF-67 hollow polyhedra for sensitive electrochemical detection of metronidazole
Source: Royal Society of Chemistry journal article supplement (doi:10.1039/d4nj01982b), 2024-01-01
Supplement: d4nj01982b1.pdf [file d4nj01982b1.pdf]

## Supplementary Material of Snowflake-shaped poly (3-thiophenemalonic acid) combined with the carbonized ZIF-8@ZIF-67 hollow polyhedron for sensitive electrochemical detection of metronidazole

Yafeng Jin\*, Fangming Han, Tao Wang, Haofu Shi, Xiaobo Li, Li Yang, Na Chen, Kaifeng Yang,  
Xinyue Song, Guangri Xu\*

*School of Chemistry and Chemical Engineering, Henan Institute of Science and Technology,  
Xinxiang, 453003, China*

*\*Corresponding author*

*E-mail address:*

*yafengjin2020@163.com*

*xugr70@163.com*

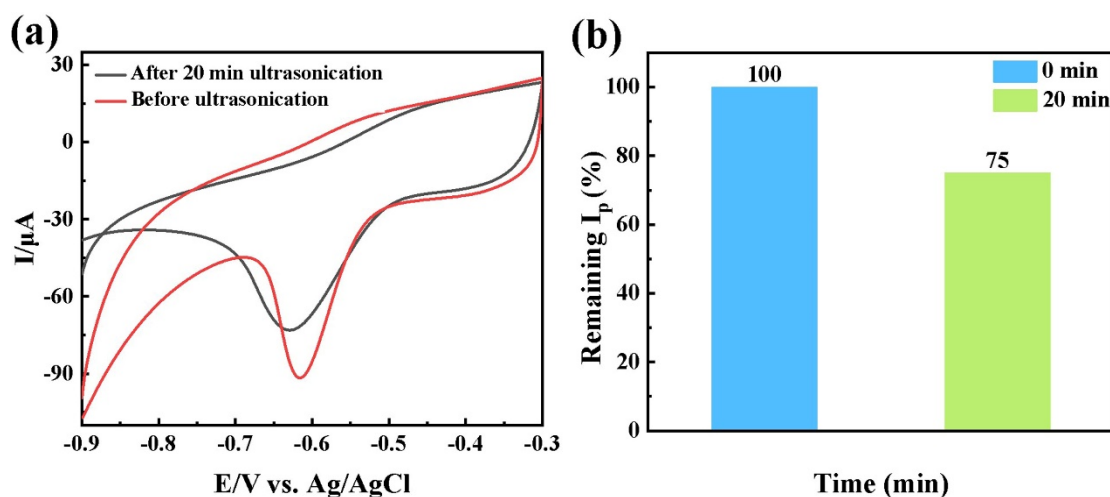

**Fig. 1S.** Sonication treatment for evaluating the mechanical stability of the C-ZIF-8@ZIF-67/P3TPA interfaces. (a) CV curves and (b) the corresponding remaining  $I_p$  percentage of C-ZIF-8@ZIF-67/P3TPA/GCE before ultrasonication and after ultrasonication (350 W, 20 min).

**Table S1.** The reproducibility of the C-ZIF-8@ZIF-67/3-TPA/GCE sensor towards 1 mM MNZ in 0.1 M PBS (pH 7).

|                          | $I_1/\mu A$ | $I_2/\mu A$ | $I_3/\mu A$ | $I_4/\mu A$ | $I_5/\mu A$ | RSD% |
|--------------------------|-------------|-------------|-------------|-------------|-------------|------|
| <b>The same sensor</b>   | 211.1       | 208.6       | 215.8       | 209.7       | 214.5       | 1.5  |
| <b>Different sensors</b> | 201.1       | 206.6       | 212.8       | 190.7       | 213.5       | 4.6  |
